# Supplementary material for: Association of Gut Microbiome and Vitamin D in Knee Osteoarthritis Patients
Source: Preprints.org preprint supplement (doi:10.20944/preprints202101.0455.v1), 2021-01-22

Supplementary Information

Supplementary Information table S1

Sequence data quality parameters and reads per sample:


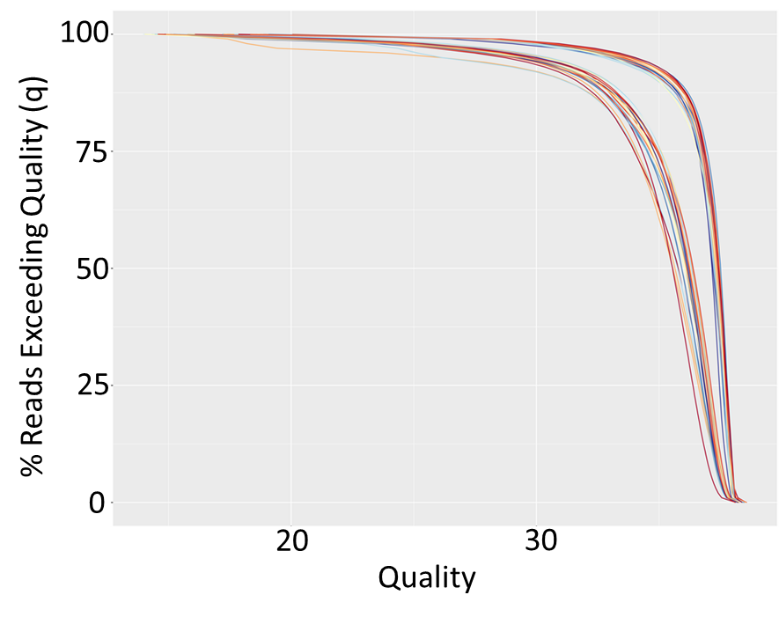


Overall quality of data

Supplementary Information table S2

OTUs with Differential abundance between groups.

Supplementary Information

Figure S1


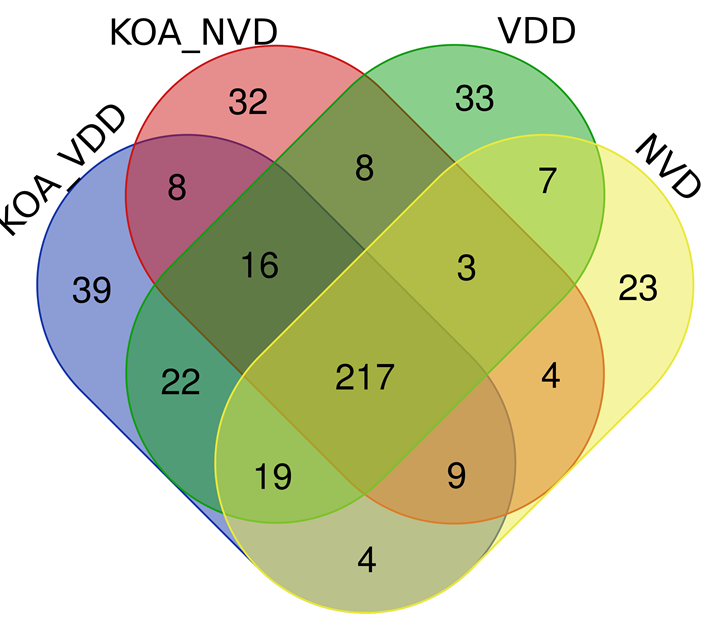


Venn diagram with excluding zero counts to OTUs in each of the groups.

Supplementary Information table S3

OTUs that are predominant in various study groups. This classification is based on excluding OTUs with counts less than 50 in each of the groups.

| **KOA KOA_VDD NVD VDD** | 4 | Bifidobacterium |
| --- | --- | --- |
|  |  | Faecalibacterium |
|  |  | Collinsella |
|  |  | Blautia |
| **KOA KOA_VDD VDD** | 2 | Prevotella_9 |
|  |  | Lachnospiraceae_unclassified |
| **KOA KOA_VDD NVD** | 2 | Bacteroides |
|  |  | Subdoligranulum |
| **KOA KOA_VDD** | 2 | Dorea |
|  |  | Catenibacterium |
| **KOA VDD** | 4 | Alloprevotella |
|  |  | Dialister |
|  |  | [Eubacterium]_coprostanoligenes_group |
|  |  | Ruminococcaceae_UCG-002 |
| **KOA_VDD VDD** | 1 | Pseudobutyrivibrio |
| **KOA** | 14 | Coriobacteriaceae_unclassified |
|  |  | Streptococcus |
|  |  | Olsenella |
|  |  | Coprococcus_2 |
|  |  | Ruminococcaceae_UCG-005 |
|  |  | Anaerotruncus |
|  |  | Christensenellaceae_R-7_group |
|  |  | Prevotellaceae_unclassified |
|  |  | Peptostreptococcaceae_unclassified |
|  |  | Lachnospiraceae_NK4A136_group |
|  |  | Ruminococcus_2 |
|  |  | Ruminococcaceae_UCG-014 |
|  |  | Ruminococcus_1 |
|  |  | Senegalimassilia |
| **KOA_VDD** | 2 | Parabacteroides |
|  |  | Escherichia-Shigella |
| **VDD** | 1 | Lachnospiraceae_UCG-005 |

LEfSe (Linear discriminant analysis effect size)

Figure S2


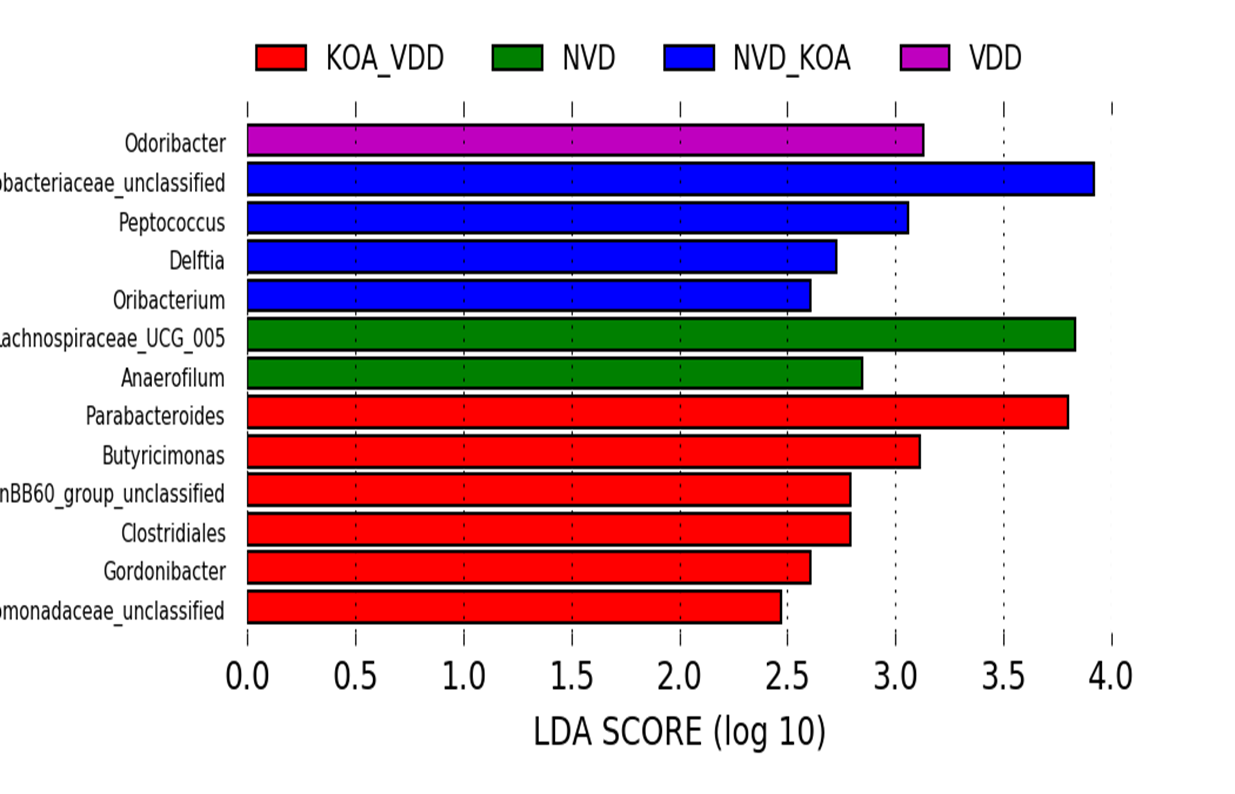


Figure S3


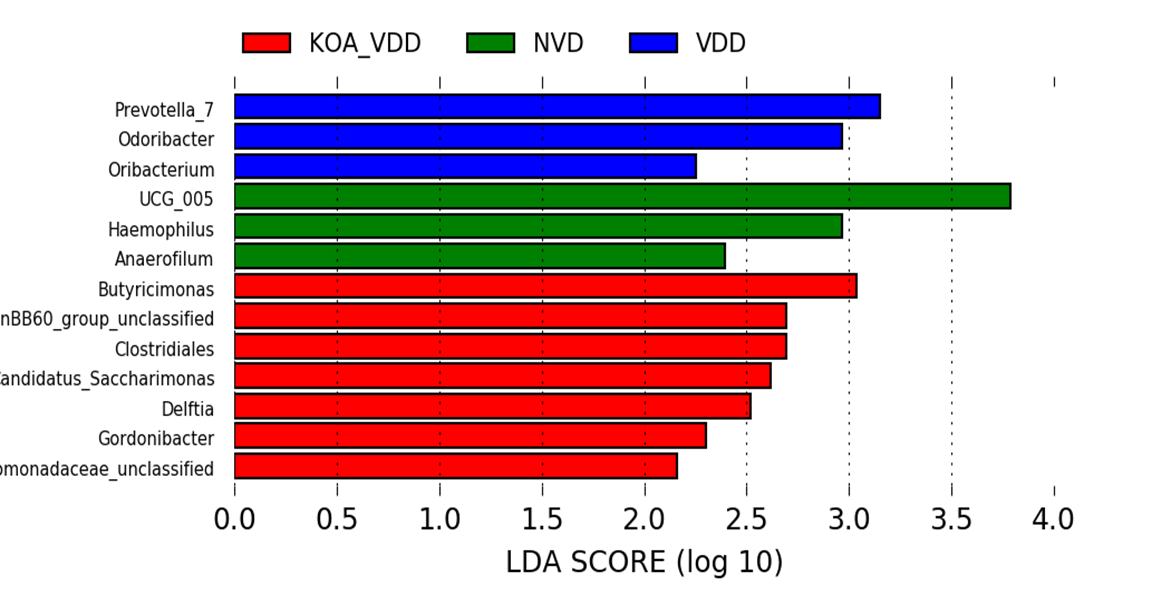


Figure S4


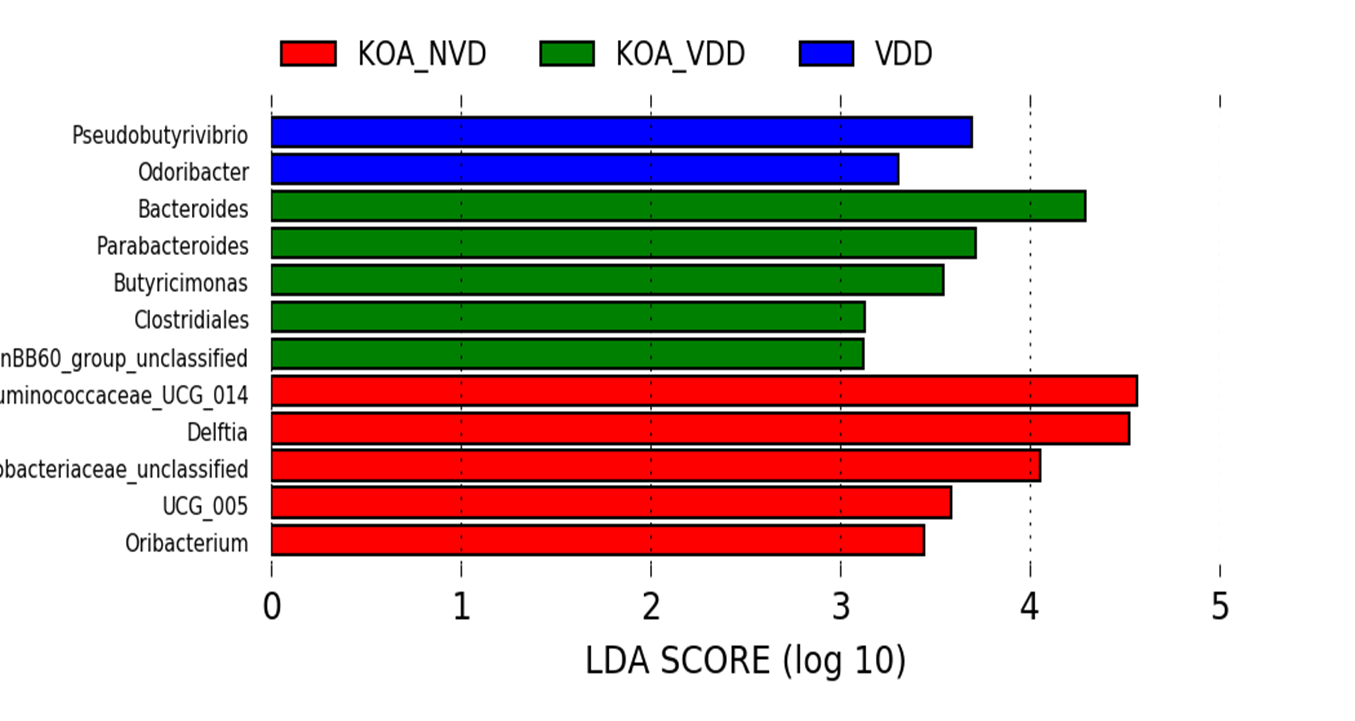


Figure S5


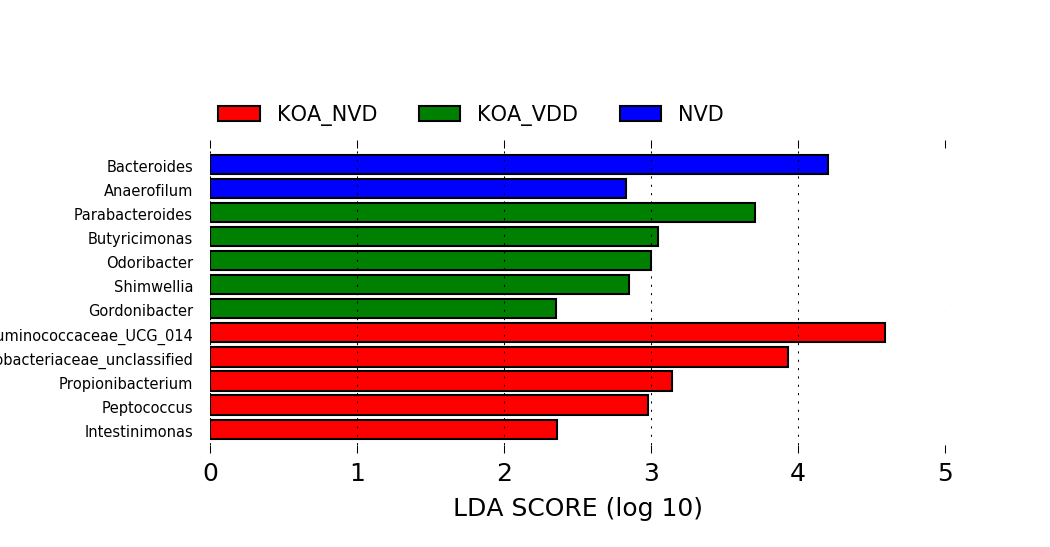


PiCRUSt


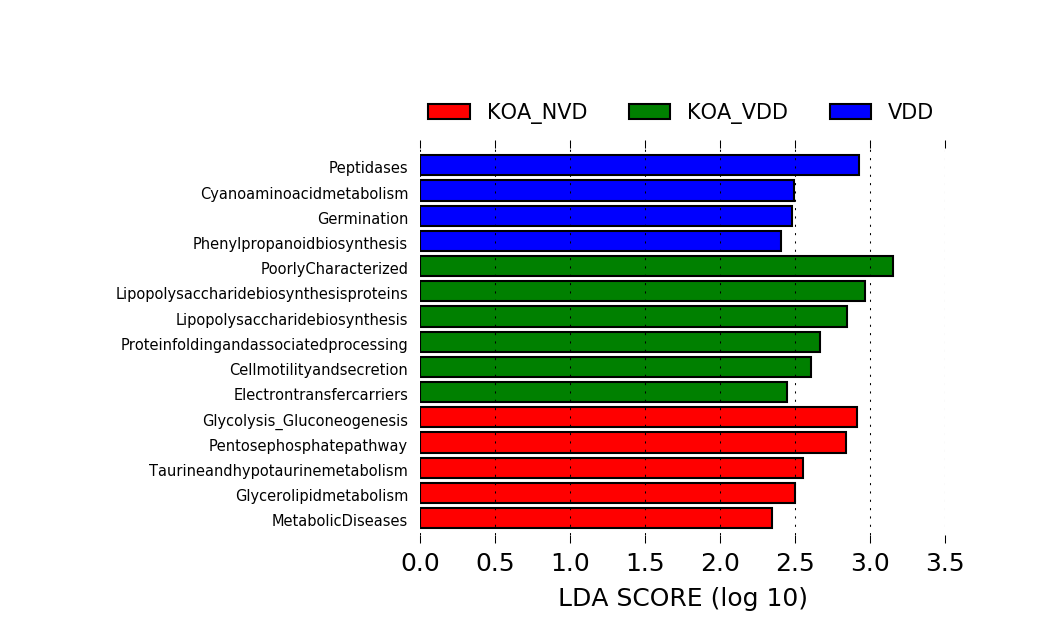
Figure S6


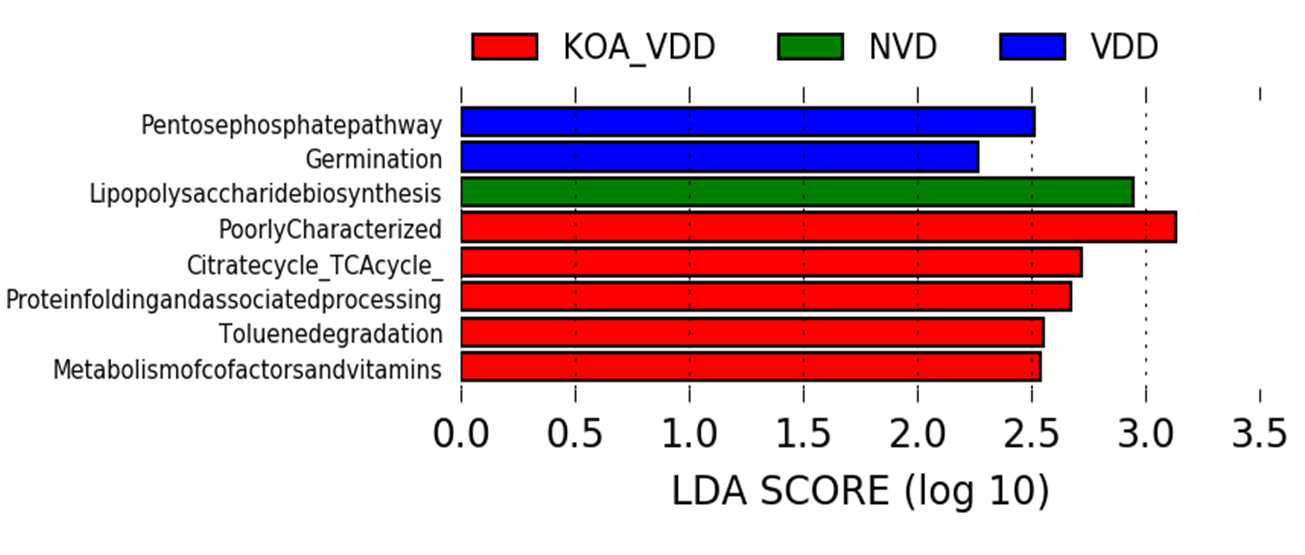

Supplement: Supplementary file 2 [file supplementary]
